# Supplementary material for: Colorimetric determination of phenytoin using indoxyl sulfate capped silver nanoparticles
Source: Royal Society of Chemistry journal article supplement (doi:10.1039/c9ay01036j), 2019-01-01
Supplement: c9ay01036j1.pdf [file c9ay01036j1.pdf]

## Supporting Information

### **Colorimetric determination of phenytoin using indoxyl sulfate capped silver nanoparticles**

**Maryam Khoubnasabjafari<sup>1</sup>, Rana Salari<sup>2</sup>, Azam Samadi<sup>3,\*</sup>, Vahid Jouyban-Gharamaleki<sup>4</sup>,  
Abolghasem Jouyban<sup>3,5</sup>**

<sup>1</sup>Tuberculosis and Lung Diseases Research Center, Tabriz University of Medical Sciences,  
Tabriz, Iran

<sup>2</sup> Drug Applied Research Center, Tabriz University of Medical Sciences, Tabriz, Iran

<sup>3</sup> Pharmaceutical Analysis Research Center and Faculty of Pharmacy, Tabriz University of  
Medical Sciences, Tabriz, Iran

<sup>4</sup>Liver and Gastrointestinal Diseases Research Center, Tabriz University of Medical Sciences,  
Tabriz, Iran

<sup>5</sup>Kimia Idea Pardaz Azarbayjan (KIPA) Science Based Company, Tabriz University

\* Corresponding author

Email: Samadi\_azam@yahoo.com; Tel: +984133379323

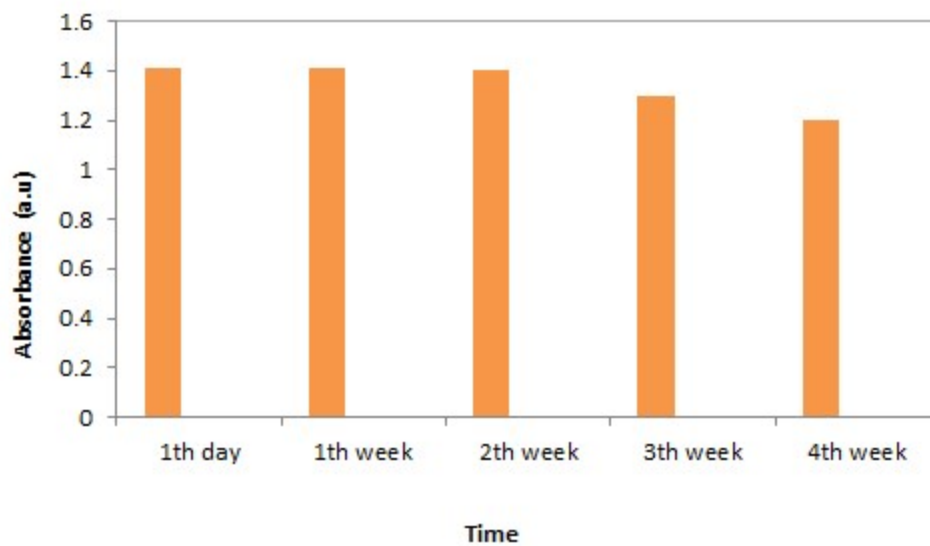

**Figure S1.** The maximum absorbance intensity ( $\lambda_{\text{max}}=390\text{ nm}$ ) of InS-AgNPs stored at  $4\text{ }^{\circ}\text{C}$  at different times

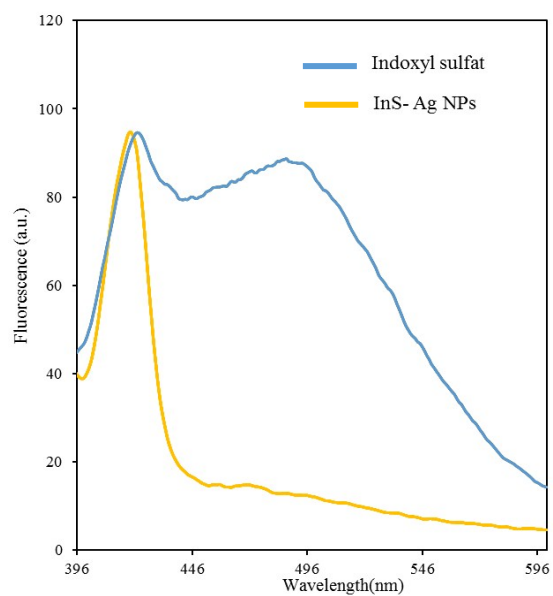

**Figure S2.** Fluorescence spectra of aqueous solutions of InS ( $1.0 \times 10^{-2}\text{ M}$ ) and InS-AgNPs ( $\lambda_{\text{ex}}=370\text{ nm}$  and  $\lambda_{\text{em}}=420\text{ nm}$ ).

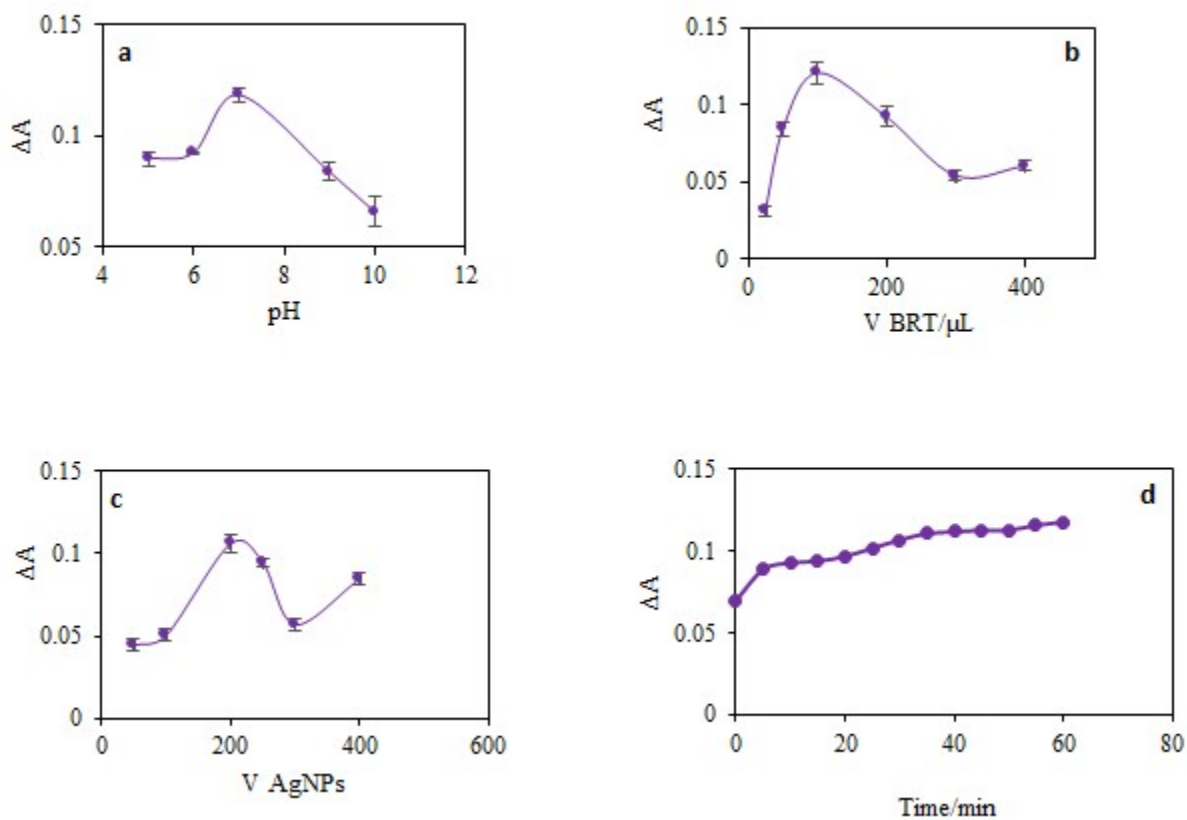

**Figure S3.** Optimization of the absorption intensity: (A) Effect of pH value. Conditions: InS-AgNPs (250  $\mu L$ ), PHT (100  $\mu g L^{-1}$ ), time (25 min); (B) Effect of BRT buffer volume. Conditions: (pH=7), other conditions are as in A. (C) Effect of InS-AgNPs solution volume. Conditions: ( $V_{BRT}=100 \mu L$ ), conditions are as in C.

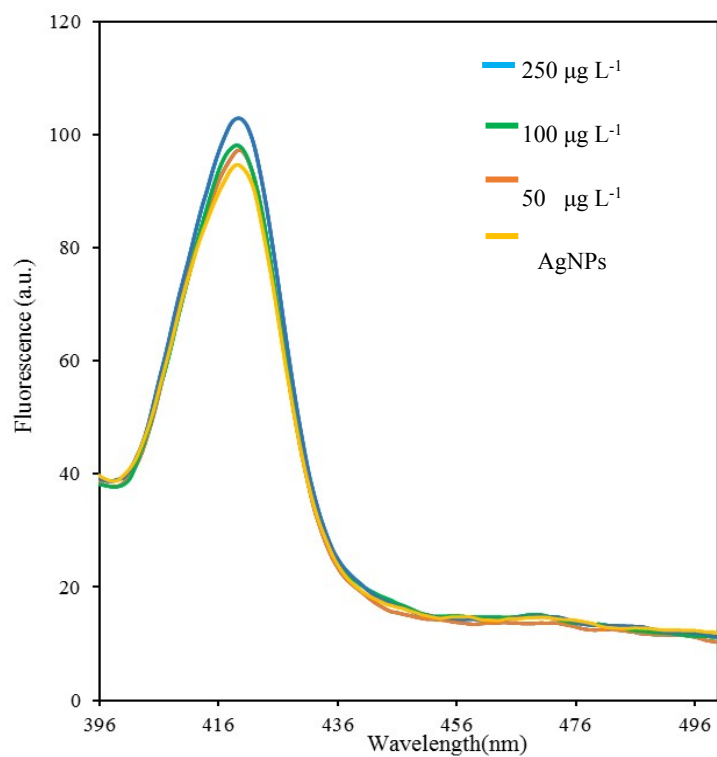

**Figure S4.** Effect of PHT on the fluorescence intensity of InS-AgNPs.
